# Supplementary material for: Drivers and implications of declining fossil fuel CO 2 in Chinese cities revealed by radiocarbon measurements
Source: Copernicus journal article supplement (doi:10.5194/egusphere-2025-1931), 2025-06-25
Supplement: Supplementary file 1 [file GD_flask_CO2_13C_14C_2022.xlsx]

## Sheet: Guangzhou
city	season	station	sampling date	start time	CO2 (ppm)	CO2_sd (ppm)	CO2_qc	δ13C (‰)	δ13C_sd (‰)	δ13C_qc	Δ14C (‰)	Δ14C_sd (‰)	Δ14C_qc		city	season	station	sampling date	start time	CO2 (ppm)	CO2_sd (ppm)	CO2_qc	δ13C (‰)	δ13C_sd (‰)	δ13C_qc	Δ14C (‰)	Δ14C_sd (‰)	Δ14C_qc
Guangzhou	summer	GZ1	2022-07-28	13:53:00	429.029	0.219255	2	-8.56478	0.0472147	2	-26.2857	1.90722	2		Guangzhou	winter	GZ1	2022-12-15	13:03:00	438.805	0.200939	2	-8.63502	0.0292152	2	-49.1877	2.05447	2
Guangzhou	summer	GZ1	2022-08-03	14:28:00	461.454	0.185715	2	-9.85236	0.0512889	2	-32.5604	1.83461	2		Guangzhou	winter	GZ1	2022-12-22	13:09:00	438.797	0.225871	2	-9.01079	0.060477	2	-45.4118	1.84008	2
Guangzhou	summer	GZ1	2022-08-16	13:20:00	435.009	0.241854	2	-9.24843	0.0396037	2	-26.6093	1.85453	2		Guangzhou	winter	GZ1	2022-12-29	13:02:00	438.605	0.180017	2	-7.85248	0.0343852	3	-54.3954	1.83288	2
Guangzhou	summer	GZ1	2022-08-19	13:02:00	430.449	0.146337	2	-8.32589	0.0377774	2	-9.85592	1.97326	2		Guangzhou	winter	GZ1	2023-01-06	13:15:00	430.961	0.132032	6	-8.92179	0.0267447	6	-35.1964	1.37117	6
Guangzhou	summer	GZ2	2022-07-28	14:53:00	435.879	0.176879	2	-9.13718	0.0462751	2	-29.1182	3.00488	2		Guangzhou	winter	GZ2	2022-12-15	13:01:00	449.356	0.152918	2	-9.16175	0.0369878	2	-61.2235	1.81992	2
Guangzhou	summer	GZ2	2022-08-03	13:18:00	440.115	0.167299	2	-9.04212	0.0269415	2	-33.136	2.47129	2		Guangzhou	winter	GZ2	2022-12-22	13:14:00	448.018	0.153092	2	-8.69913	0.0277785	2	-60.8824	1.83975	2
Guangzhou	summer	GZ2	2022-08-15	13:55:00	431.381	0.149518	2	-8.56518	0.0322862	2	-23.9331	2.07184	2		Guangzhou	winter	GZ2	2022-12-29	13:37:00	437.518	0.173816	2	-8.5639	0.0445789	2	-49.3495	1.98982	2
Guangzhou	summer	GZ2	2022-08-19	13:09:00	430.541	0.208031	2	-9.16703	0.0505679	2	-34.4612	2.13485	2		Guangzhou	winter	GZ2	2023-01-06	13:59:00	438.713	0.141317	6	-9.03742	0.036743	6	-55.6729	1.34552	6
Guangzhou	summer	GZ3	2022-07-28	16:23:00	445.039	0.156173	2	-8.44106	0.0423651	2	-35.7772	1.85536	2		Guangzhou	winter	GZ3	2022-12-15	14:56:00	433.124	0.176038	2	-7.4838	0.0370927	3	-46.5021	1.82905	2
Guangzhou	summer	GZ3	2022-08-03	15:36:00	418.231	0.163445	2	-8.4931	0.0541162	2	-27.1396	2.33964	2		Guangzhou	winter	GZ3	2022-12-22	14:24:00	437.793	0.180816	2	-8.5465	0.0517855	2	-46.1746	1.85288	2
Guangzhou	summer	GZ3	2022-08-15	15:19:00	422.654	0.228642	2	-9.09063	0.027954	2	-14.9005	1.90853	2		Guangzhou	winter	GZ3	2022-12-29	13:10:00	440.083	0.154621	2	-8.49729	0.0660122	2	-51.403	2.0872	2
Guangzhou	summer	GZ3	2022-08-19	15:57:00	431.431	0.258351	2	-8.68907	0.0375571	2	-21.7664	1.98454	2		Guangzhou	winter	GZ3	2023-01-06	13:31:00	432.2	0.127744	6	-8.91972	0.044431	6	-41.8292	1.38	6
Guangzhou	summer	GZ4	2022-07-28	14:56:00	428.544	0.212904	2	-8.56522	0.0357366	2	-27.112	1.91671	2		Guangzhou	winter	GZ4	2022-12-15	14:40:00	445.686	0.241146	2	-9.0364	0.0650484	2	-57.4627	2.40974	2
Guangzhou	summer	GZ4	2022-08-03	13:46:00	467.839	0.238372	2	-9.96084	0.0648566	2	-29.9479	1.92991	2		Guangzhou	winter	GZ4	2022-12-22	14:23:00	442.852	0.188905	2	-9.37	0.0684358	2	-50.8118	1.93581	2
Guangzhou	summer	GZ4	2022-08-16	13:54:00	419.569	0.156658	2	-8.79539	0.0258228	2	-21.6469	1.92402	2		Guangzhou	winter	GZ4	2022-12-29	14:15:00	441.861	0.194171	2	-9.04324	0.0540599	2	-54.1662	1.82544	2
Guangzhou	summer	GZ4	2022-08-19	13:32:00	418.344	0.170242	2	-8.4873	0.03324	2	-19.6454	2.10861	2		Guangzhou	winter	GZ4	2023-01-06	15:15:00	429.298	0.214679	2	-8.71732	0.0152456	2	-36.292	1.81667	2
Guangzhou	summer	GZ5	2022-07-28	16:37:00	448.659	0.168684	2	-9.83783	0.0168891	2	-42.7989	1.92903	2		Guangzhou	winter	GZ5	2022-12-15	15:43:00	437.414	0.196583	2	-8.19703	0.0550439	3	-45.9699	3.63839	2
Guangzhou	summer	GZ5	2022-08-03	16:58:00	429.293	0.165958	2	-8.88391	0.0326341	2	-35.7488	2.46381	2		Guangzhou	winter	GZ5	2022-12-22	15:44:00	444.339	0.179758	2	-8.59414	0.0223823	2	-57.6036	1.82379	2
Guangzhou	summer	GZ5	2022-08-16	16:05:00	422.801	0.192045	2	-9.00369	0.062107	2	-32.229	1.83636	2		Guangzhou	winter	GZ5	2022-12-29	14:45:00	440.328	0.190525	2	-8.76438	0.0665098	2	-50.4911	1.82202	2
Guangzhou	summer	GZ5	2022-08-19	14:40:00	463.911	0.200107	2	-10.5073	0.0680236	2	-59.7787	1.81942	2		Guangzhou	winter	GZ5	2023-01-06	15:20:00	428.772	0.195581	2	-8.15594	0.0259058	2	-37.9147	1.92375	2
Guangzhou	summer	GZ6	2022-07-28	16:15:00	439.837	0.159972	2	-9.0502	0.03969	2	-41.2472	2.49136	2		Guangzhou	winter	GZ6	2022-12-15	15:58:00	444.776	0.19531	2	-8.96517	0.0567564	2	-58.2043	1.76838	2
Guangzhou	summer	GZ6	2022-08-03	13:31:00	489.093	0.221199	2	-10.9506	0.0333222	2	-59.1294	2.3622	2		Guangzhou	winter	GZ6	2022-12-22	15:38:00	443.159	0.35459	2	-10.1906	0.0432259	3	-58.6473	1.78193	2
Guangzhou	summer	GZ6	2022-08-16	15:08:00	424.503	0.284316	2	-8.57747	0.076853	2	-19.6381	1.93841	2		Guangzhou	winter	GZ6	2022-12-29	15:25:00	443.879	0.213524	2	-8.92774	0.0647706	2	-58.4575	1.79475	2
Guangzhou	summer	GZ6	2022-08-19	14:38:00	442.553	0.174615	2	-9.40324	0.0527659	2	-48.2796	1.86723	2		Guangzhou	winter	GZ6	2023-01-06	16:31:00	431.815	0.115834	6	-8.69277	0.0259246	6	-36.0721	1.41102	6
Guangzhou	summer	GZ7	2022-08-01	15:39:00	426.028	0.156868	2	-8.83768	0.0228073	2	-20.5721	2.33893	2		Guangzhou	winter	GZ7	2022-12-15	14:16:00	439.616	0.162268	2	-9.54571	0.0678773	3	-46.8831	1.86608	2
Guangzhou	summer	GZ7	2022-08-16	14:29:00	423.881	0.19301	2	-9.34874	0.0365313	2	-29.4812	2.48499	2		Guangzhou	winter	GZ7	2022-12-22	14:12:00	442.818	0.188567	2	-9.22578	0.0355445	2	-53.4431	1.90449	2
Guangzhou	summer	GZ7	2022-08-24	16:14:00	421.932	0.172301	2	-8.71919	0.02033	2	-21.8981	2.73092	2		Guangzhou	winter	GZ7	2022-12-29	14:15:00	442.162	0.214409	2	-8.7281	0.0715206	2	-53.6984	1.79996	2
Guangzhou	summer	GZ7	2022-08-30	14:47:00	419.185	0.173392	2	-8.35095	0.0272795	2	-30.2133	2.13729	2		Guangzhou	winter	GZ7	2023-01-06	14:20:00	431.71	0.176532	2	-8.67539	0.050273	2	-38.236	1.81964	2
Guangzhou	summer	GZ8	2022-07-28	13:15:00	443.636	0.185754	2	-9.60849	0.0407265	2	-41.2423	1.92004	2		Guangzhou	winter	GZ8	2022-12-15	15:46:00	445.518	0.2621	2	-9.40111	0.0295374	2	-56.0932	2.00409	2
Guangzhou	summer	GZ8	2022-08-03	13:44:00	429.204	0.174321	2	-8.59418	0.0300946	2	-22.1638	1.87604	2		Guangzhou	winter	GZ8	2022-12-22	16:22:00	442.654	0.192241	2	-9.33412	0.0581617	2	-56.6136	1.93303	2
Guangzhou	summer	GZ8	2022-08-15	13:13:00	457.57	0.187649	2	-9.74758	0.0147215	2	-27.6218	2.04093	2		Guangzhou	winter	GZ8	2022-12-29	15:44:00	435.18	0.176166	2	-8.93789	0.0232358	2	-40.4051	2.22045	2
Guangzhou	summer	GZ8	2022-08-19	13:05:00	440.736	0.165197	2	-9.62027	0.0227009	2	-40.2088	1.90188	2		Guangzhou	winter	GZ8	2023-01-06	16:17:00	436.658	0.187122	2	-8.96993	0.0262636	2	-45.2107	2.18265	2
Guangzhou	summer	GZ9	2022-07-28	15:15:00	451.803	0.213926	2	-10.0722	0.075714	2	-37.0732	2.56605	2		Guangzhou	winter	GZ9	2022-12-15	14:29:00	436.655	0.222348	2	-8.64235	0.0440336	2	-51.2874	2.69254	2
Guangzhou	summer	GZ9	2022-08-03	14:14:00	440.63	0.174133	2	-9.2209	0.0188785	2	-28.9362	2.17954	2		Guangzhou	winter	GZ9	2022-12-22	14:52:00	442.594	0.220249	2	-9.14199	0.0394435	2	-52.9348	2.38946	2
Guangzhou	summer	GZ9	2022-08-16	14:55:00	456.491	0.267496	2	-9.88564	0.0295704	2	-41.9902	1.89838	2		Guangzhou	winter	GZ9	2022-12-29	13:53:00	442.543	0.198292	2	-8.61719	0.0969863	2	-58.4097	1.97193	2
Guangzhou	summer	GZ9	2022-08-19	13:40:00	443.125	0.19854	2	-9.87288	0.0378163	2	-35.3658	1.92039	2		Guangzhou	winter	GZ9	2023-01-06	14:14:00	432.687	0.168262	6	-8.49844	0.0524239	6	-41.7914	1.28812	6
Guangzhou	summer	GZ10	2022-07-28	13:20:00	419	0.169186	2	-8.63387	0.0931815	2	-37.9353	1.86841	6		Guangzhou	winter	GZ10	2022-12-15	13:23:00	447.07	0.170324	2	-9.28674	0.0777773	2	-50.0795	2.49053	2
Guangzhou	summer	GZ10	2022-08-03	13:22:00	424.768	0.182295	2	-8.81272	0.106881	2	-25.9151	1.95472	2		Guangzhou	winter	GZ10	2022-12-22	13:05:00	448.055	0.208866	2	-8.91658	0.0238003	2	-57.5482	2.05814	2
Guangzhou	summer	GZ10	2022-08-16	13:53:00	453.801	0.270877	2	-10.3725	0.0241426	2	-60.801	2.03021	2		Guangzhou	winter	GZ10	2022-12-29	13:58:00	456.744	0.204375	2	-9.11222	0.0976523	2	-79.879	1.86644	3
Guangzhou	summer	GZ10	2022-08-19	13:25:00	465.481	0.221707	2	-10.3539	0.133089	2	-14.6273	1.89836	2		Guangzhou	winter	GZ10	2023-01-06	13:02:00	437.559	0.130306	6	-8.86343	0.024526	6	-45.992	1.33916	6

## Sheet: Shenzhen
city	season	station	sampling date	start time	CO2 (ppm)	CO2_sd (ppm)	CO2_qc	δ13C (‰)	δ13C_sd (‰)	δ13C_qc	Δ14C (‰)	Δ14C_sd (‰)	Δ14C_qc		city	season	station	sampling date	start time	CO2 (ppm)	CO2_sd (ppm)	CO2_qc	δ13C (‰)	δ13C_sd (‰)	δ13C_qc	Δ14C (‰)	Δ14C_sd (‰)	Δ14C_qc
Shenzhen	summer	SZ1	2022-08-02	14:21:00	428.831	0.243195	2	-8.72452	0.0625503	2	-24.999	2.01437	2		Shenzhen	winter	SZ1	2022-12-12	14:26:00	460.34	0.19642	2	-9.41684	0.0229063	2	-78.184	2.83592	2
Shenzhen	summer	SZ1	2022-08-08	14:49:00	423.095	0.187052	2	-8.18918	0.033394	2	-24.4949	1.89084	2		Shenzhen	winter	SZ1	2022-12-19	14:07:00	430.499	0.165742	2	-9.12494	0.0498017	2	-27.4546	2.71943	2
Shenzhen	summer	SZ1	2022-08-15	14:22:00	415.682	0.155537	2	-8.13507	0.0362397	2	-0.224035	2.25291	2		Shenzhen	winter	SZ1	2022-12-26	14:31:00	429.629	0.176468	2	-8.96597	0.0362593	2	-20.6841	2.50218	2
Shenzhen	summer	SZ1	2022-08-22	14:08:00	441.743	0.166897	2	-9.29731	0.026314	2	-44.0625	1.88776	2		Shenzhen	winter	SZ1	2023-01-02	16:50:00	444.701	0.192899	2	-9.17261	0.0353748	2	-59.0237	2.28868	2
Shenzhen	summer	SZ2	2022-07-29	13:23:00	449.892	0.156415	2	-9.63144	0.033133	2	-67.0356	2.16753	2		Shenzhen	winter	SZ2	2022-12-12	15:04:00	438.568	0.174433	2	-9.18144	0.0371268	2	-47.63	2.43393	2
Shenzhen	summer	SZ2	2022-08-02	14:36:00	437.171	0.165002	2	-8.88345	0.038598	2	-63.8753	2.00321	2		Shenzhen	winter	SZ2	2022-12-19	15:09:00	443.898	0.197756	2	-9.46748	0.0381442	2	-57.4165	1.9058	2
Shenzhen	summer	SZ2	2022-08-08	15:00:00	414.663	0.22267	2	-8.71821	0.17481	2	-5.5402	1.94122	3		Shenzhen	winter	SZ2	2022-12-26	13:01:00	446.791	0.166842	2	-9.48437	0.0475491	2	-60.8947	2.0531	2
Shenzhen	summer	SZ2	2022-08-22	14:46:00	439.492	0.189754	2	-9.18083	0.0677669	2	-59.3127	1.81189	2		Shenzhen	winter	SZ2	2023-01-02	13:59:00	437.856	0.189204	2	-9.30139	0.0607188	2	-41.5577	2.16893	2
Shenzhen	summer	SZ3	2022-07-29	16:15:00	441.374	0.203832	2	-9.41742	0.0380792	2	-53.9741	1.74618	2		Shenzhen	winter	SZ3	2022-12-12	13:38:00	441.478	0.186548	2	-9.41637	0.0319126	2	-55.4565	2.20926	2
Shenzhen	summer	SZ3	2022-08-02	13:23:00	421.642	0.193407	2	-8.36631	0.0178021	2	-14.9053	2.24097	2		Shenzhen	winter	SZ3	2022-12-19	15:49:00	450.623	0.162718	2	-9.56958	0.0454579	2	-71.2009	1.87946	2
Shenzhen	summer	SZ3	2022-08-08	13:30:00	418.295	0.16497	2	-8.49814	0.0330564	2	-5.04371	1.79321	2		Shenzhen	winter	SZ3	2022-12-26	15:49:00	449.372	0.170622	2	-9.6866	0.050886	2	-64.4328	2.24002	2
Shenzhen	summer	SZ3	2022-08-22	13:28:00	416.721	0.216136	2	-8.64391	0.0955432	2	-9.3701	1.93032	2		Shenzhen	winter	SZ3	2023-01-02	15:54:00	429.593	0.116852	6	-8.94353	0.0531211	6	-34.2232	1.88266	6
Shenzhen	summer	SZ4	2022-07-29	16:26:00	452.833	0.214214	2	-9.61094	0.0447353	2	-65.3559	1.72927	2		Shenzhen	winter	SZ4	2022-12-12	13:40:00	444.29	0.216508	2	-9.51451	0.0530772	2	-55.5344	2.32244	2
Shenzhen	summer	SZ4	2022-08-02	13:22:00	421.648	0.154939	2	-8.5945	0.0225014	2	-11.8047	1.88267	2		Shenzhen	winter	SZ4	2022-12-19	13:49:00	449.09	0.183815	2	-9.57144	0.0371233	2	-58.8805	2.2437	2
Shenzhen	summer	SZ4	2022-08-08	13:26:00	418.093	0.226852	2	-8.36543	0.0498799	2	-6.89287	2.08679	2		Shenzhen	winter	SZ4	2022-12-26	13:28:00	450.957	0.177004	2	-9.7203	0.0364649	2	-68.0863	1.91226	2
Shenzhen	summer	SZ4	2022-08-22	13:26:00	418.573	0.185779	2	-8.52738	0.0598814	2	-10.8193	1.86029	2		Shenzhen	winter	SZ4	2023-01-02	13:58:00	431.199	0.119495	6	-9.02059	0.038824	6	-32.4347	1.52009	6
Shenzhen	summer	SZ5	2022-07-31	13:02:00	443.019	0.180769	2	-9.2164	0.0139018	2	-49.4166	1.85316	2		Shenzhen	winter	SZ5	2022-12-12	16:25:00	443.905	0.168877	2	-9.64357	0.0593483	2	-56.7375	2.00296	2
Shenzhen	summer	SZ5	2022-08-02	16:16:00	430.682	0.190794	2	-8.57646	0.0233152	2	-25.6532	1.99757	2		Shenzhen	winter	SZ5	2022-12-19	14:54:00	447.184	0.171779	2	-9.62677	0.0429569	2	-63.7425	1.92655	2
Shenzhen	summer	SZ5	2022-08-08	16:48:00	420.074	0.134056	2	-8.54061	0.067302	2	-6.77995	1.98303	2		Shenzhen	winter	SZ5	2022-12-26	14:50:00	440.353	0.200821	2	-9.36935	0.0191346	2	-45.8337	2.52104	2
Shenzhen	summer	SZ5	2022-08-22	16:22:00	423.508	0.161777	2	-8.83716	0.0529272	2	-23.6671	1.96066	2		Shenzhen	winter	SZ5	2023-01-02	15:54:00	430.211	0.123856	6	-9.02884	0.0223958	6	-35.5774	1.37049	6
Shenzhen	summer	SZ6	2022-08-02	16:56:00	433.511	0.184016	2	-8.79164	0.0456918	2	-38.4632	2.00971	2		Shenzhen	winter	SZ6	2022-12-12	16:04	460.117	0.246309	2	-9.61781	0.053502	2	-85.9822	2.28113	2
Shenzhen	summer	SZ6	2022-08-08	16:53:00	426.863	0.1648	2	-8.11857	0.0313133	2	-13.1929	1.88179	2		Shenzhen	winter	SZ6	2022-12-19	15:38:00	429.106	0.12988	6	-8.64108	0.0245336	6	-24.457	1.91056	6
Shenzhen	summer	SZ6	2022-08-15	16:27:00	426.774	0.157073	2	-9.22746	0.0344012	2	-24.8208	1.74527	2		Shenzhen	winter	SZ6	2022-12-26	16:41:00	425.995	0.231491	2	-8.92823	0.0188211	2	-24.0384	2.68341	2
Shenzhen	summer	SZ6	2022-08-22	16:05:00	426.088	0.157543	2	-8.69133	0.0360921	2	-26.7146	1.78241	2		Shenzhen	winter	SZ6	2023-01-02	18:14:00	449.308	0.183657	2	-9.24743	0.0463613	2	-71.1163	2.43339	2
Shenzhen	summer	SZ7	2022-08-08	13:40:00	420.988	0.237475	2	-8.72001	0.157676	2	-14.7207	1.67759	2		Shenzhen	winter	SZ7	2022-12-12	13:15:00	465.263	0.172265	2	-9.89209	0.0602738	2	-84.8998	2.3461	2
Shenzhen	summer	SZ7	2022-08-15	13:17:00	429.193	0.254057	2	-8.75345	0.0357852	2	-23.3261	2.12974	2		Shenzhen	winter	SZ7	2022-12-19	13:57:00	429.221	0.205325	2	-8.7323	0.0486824	2	-16.205	2.36433	2
Shenzhen	summer	SZ7	2022-08-22	13:13:00	428.862	0.241682	2	-8.94887	0.122477	2	-26.6961	2.56634	2		Shenzhen	winter	SZ7	2022-12-26	13:37:00	430.408	0.189437	2	-8.94123	0.0870913	2	-25.0537	2.38369	2
Shenzhen	summer	SZ7	2022-08-29	13:04:00	427.204	0.144087	2	-8.70085	0.0211085	2	-14.6545	1.80717	2		Shenzhen	winter	SZ7	2023-01-02	13:51:00	452.498	0.186699	2	-9.67023	0.0391155	2	-68.1512	2.32298	2
Shenzhen	summer	SZ8	2022-07-29	15:48:00	429.781	0.191677	2	-8.75124	0.0215359	2	-33.2314	2.7502	2		Shenzhen	winter	SZ8	2022-12-12	15:05:00	459.996	0.168668	2	-9.41022	0.0509455	2	-78.943	2.39323	2
Shenzhen	summer	SZ8	2022-08-02	15:59:00	425.042	0.163021	2	-8.67647	0.040601	2	-24.4353	1.94089	2		Shenzhen	winter	SZ8	2022-12-19	14:28:00	423.977	0.221897	2	-8.93308	0.0802602	2	-16.3382	2.30056	2
Shenzhen	summer	SZ8	2022-08-08	15:15:00	419.989	0.163486	2	-9.10569	0.0183836	2	-9.09973	1.84641	2		Shenzhen	winter	SZ8	2022-12-26	15:29:00	423.061	0.182113	2	-8.66875	0.0526569	2	-17.5828	2.54655	2
Shenzhen	summer	SZ8	2022-08-15	14:51:00	419.478	0.190428	2	-7.96706	0.0685286	2	-6.63903	1.93422	2		Shenzhen	winter	SZ8	2023-01-02	16:06:00	447.265	0.248446	2	-9.1597	0.032804	2	-62.3918	2.70102	2
Shenzhen	summer	SZ9	2022-07-29	14:06:00	430.605	0.166956	2	-8.92413	0.064064	2	-29.9768	2.05967	2		Shenzhen	winter	SZ9	2022-12-12	13:40:00	461.714	0.218738	2	-9.4506	0.047787	2	-85.0123	2.46727	2
Shenzhen	summer	SZ9	2022-08-02	14:19:00	416.706	0.149694	2	-8.50023	0.0702507	2	-10.31	1.96626	2		Shenzhen	winter	SZ9	2022-12-19	13:16:00	427.878	0.192388	2	-9.13443	0.0366329	2	-17.1197	2.45597	2
Shenzhen	summer	SZ9	2022-08-08	13:57:00	415.857	0.18916	2	-8.72539	0.047167	2	-5.66752	2.36223	2		Shenzhen	winter	SZ9	2022-12-26	13:53:00	429.543	0.211855	2	-8.85554	0.0945356	2	-21.4347	2.81292	2
Shenzhen	summer	SZ9	2022-08-15	13:33:00	418.671	0.16126	2	-7.95956	0.0544909	2	-6.37732	2.33855	2		Shenzhen	winter	SZ9	2023-01-02	14:41:00	447.471	0.200979	2	-9.33519	0.0387942	2	-57.0167	2.3188	2
Shenzhen	summer	SZ10	2022-07-29	16:52:00	435.849	0.188915	2	-9.16479	0.0236957	2	-37.8157	2.50971	4		Shenzhen	winter	SZ10	2022-12-12	13:24:00	445.361	0.171505	2	-9.46795	0.0310279	2	-60.3714	2.06832	2
Shenzhen	summer	SZ10	2022-08-08	14:27:00	445.873	0.203897	2	-9.44292	0.0282605	2	-5.22289	2.14402	2		Shenzhen	winter	SZ10	2022-12-19	13:07:00	443.383	0.202035	2	-9.33488	0.0264411	2	-52.2725	2.05248	2
Shenzhen	summer	SZ10	2022-08-15	13:20:00	420.005	0.188234	2	-8.10164	0.0400331	2	-8.90776	2.12272	2		Shenzhen	winter	SZ10	2022-12-26	14:37:00	442.18	0.158957	2	-9.64635	0.0560294	2	-56.1242	1.9249	2
Shenzhen	summer	SZ10	2022-08-22	14:05:00	431.156	0.310405	2	-9.41028	0.038461	2	-6.21457	1.44445	6		Shenzhen	winter	SZ10	2023-01-02	14:36:00	437.387	0.141571	6	-9.27727	0.0189782	6	-42.2408	1.58082	6

## Sheet: Zhanjiang
city	season	station	sampling date	start time	CO2 (ppm)	CO2_sd (ppm)	CO2_qc	δ13C (‰)	δ13C_sd (‰)	δ13C_qc	Δ14C (‰)	Δ14C_sd (‰)	Δ14C_qc		city	season	station	sampling date	start time	CO2 (ppm)	CO2_sd (ppm)	CO2_qc	δ13C (‰)	δ13C_sd (‰)	δ13C_qc	Δ14C (‰)	Δ14C_sd (‰)	Δ14C_qc
Zhanjiang	summer	ZJ1	2022-07-25	14:56:00	475.345	0.29485	2	-10.4032	0.0440266	2	-16.8554	2.53248	2		Zhanjiang	winter	ZJ1	2022-12-14	15:44:00	430.09	0.153982	2	-8.64396	0.0737174	2	-20.9621	2.06095	2
Zhanjiang	summer	ZJ1	2022-08-01	13:06:00	455.48	0.21905	2	-9.39212	0.10184	2	-12.1057	2.36939	2		Zhanjiang	winter	ZJ1	2022-12-21	16:07:00	430.912	0.166307	2	-9.15945	0.0282682	2	-28.8763	2.18762	2
Zhanjiang	summer	ZJ1	2022-08-24	13:02:00	481.798	0.212763	2	-10.4081	0.078222	2	-14.5847	1.76804	2		Zhanjiang	winter	ZJ1	2022-12-28	15:09:00	439.889	0.233838	2	-9.3527	0.0413236	2	-47.195	2.13487	2
Zhanjiang	summer	ZJ1	2022-08-30	13:17:00	482.969	0.200333	2	-10.5409	0.0175367	2	-32.8987	1.80948	2		Zhanjiang	winter	ZJ1	2023-01-04	15:49:00	439.744	0.133771	6	-8.77219	0.0366688	3	-45.9449	1.72951	6
Zhanjiang	summer	ZJ2	2022-07-25	18:52:00	424.689	0.181233	2	-8.72626	0.034141	2	-6.54824	1.82723	2		Zhanjiang	winter	ZJ2	2022-12-14	13:57:00	429.337	0.188709	2	-8.96016	0.0249182	2	-17.5553	2.79357	2
Zhanjiang	summer	ZJ2	2022-08-01	16:58:00	453.859	0.208665	2	-9.79442	0.0456441	2	-34.8248	2.08564	2		Zhanjiang	winter	ZJ2	2022-12-21	13:51:00	435.246	0.234711	2	-8.92507	0.039794	2	-37.864	2.28492	2
Zhanjiang	summer	ZJ2	2022-08-24	15:33:00	454.768	0.214613	2	-10.0059	0.04805	2	-36.4459	1.95389	2		Zhanjiang	winter	ZJ2	2022-12-28	13:08:00	436.993	0.223187	2	-9.02954	0.0460338	2	-39.7344	2.04832	2
Zhanjiang	summer	ZJ2	2022-08-30	15:23:00	443.2	0.18882	2	-9.2561	0.0325372	2	-16.1355	1.86552	2		Zhanjiang	winter	ZJ2	2023-01-04	13:28:00	447.731	0.160837	6	-9.26857	0.0412652	6	-46.854	1.66192	6
Zhanjiang	summer	ZJ3	2022-07-25	13:06:00	445.861	0.172333	2	-9.79063	0.0461151	2	-13.228	1.82544	2		Zhanjiang	winter	ZJ3	2022-12-14	13:39:00	428.87	0.191678	2	-9.11474	0.0412365	2	-21.333	2.13169	2
Zhanjiang	summer	ZJ3	2022-08-01	16:01:00	473.226	0.265964	2	-10.149	0.0373508	2	-18.8672	1.8296	2		Zhanjiang	winter	ZJ3	2022-12-21	13:30:00	433.916	0.228654	2	-9.13664	0.0183318	2	-32.4277	2.29498	2
Zhanjiang	summer	ZJ3	2022-08-24	13:57:00	455.058	0.185579	2	-9.71022	0.037625	2	-24.6763	2.11711	2		Zhanjiang	winter	ZJ3	2022-12-28	13:59:00	439.323	0.247517	2	-9.03299	0.034699	2	-44.8705	2.06464	2
Zhanjiang	summer	ZJ3	2022-08-30	14:27:00	493.235	0.239131	2	-11.0229	0.0154349	2	-16.6413	1.75872	2		Zhanjiang	winter	ZJ3	2023-01-04	13:01:00	443.478	0.160839	6	-8.80676	0.0416769	3	-49.3693	1.65788	6
Zhanjiang	summer	ZJ4	2022-07-25	18:04:00	420.109	0.162696	2	-8.71698	0.0460831	2	-7.2415	1.88077	2		Zhanjiang	winter	ZJ4	2022-12-14	16:51:00	432.894	0.193698	2	-8.96321	0.0342815	2	-23.928	2.2229	2
Zhanjiang	summer	ZJ4	2022-08-01	15:31:00	431.093	0.211786	2	-8.63911	0.0445575	2	-9.52155	1.79566	2		Zhanjiang	winter	ZJ4	2022-12-21	15:12:00	433.199	0.307954	2	-9.28132	0.0461325	2	-34.0454	2.15161	2
Zhanjiang	summer	ZJ4	2022-08-24	16:47:00	437.856	0.233399	2	-9.10513	0.0453346	2	-18.2127	1.78745	2		Zhanjiang	winter	ZJ4	2022-12-28	15:06:00	441.142	0.303414	2	-8.96597	0.0509686	2	-44.6941	2.14682	2
Zhanjiang	summer	ZJ4	2022-08-30	14:20:00	429.021	0.214228	2	-9.15381	0.0460309	2	-21.9992	1.80063	2		Zhanjiang	winter	ZJ4	2023-01-04	14:30:00	445.452	0.253965	2	-8.83154	0.04438	3	-52.0477	2.20918	2
Zhanjiang	summer	ZJ5	2022-07-25	16:53:00	511.038	0.282265	3	-11.314	0.0423068	3	-7.68719	1.92866	2		Zhanjiang	winter	ZJ5	2022-12-14	15:13:00	432.208	0.17909	2	-9.05147	0.0414952	2	-26.0112	2.04787	2
Zhanjiang	summer	ZJ5	2022-08-01	16:01:00	434.55	0.219171	2	-8.69403	0.0448042	2	-13.4966	1.88251	2		Zhanjiang	winter	ZJ5	2022-12-21	13:31:00	437.073	0.20981	2	-9.78432	0.0252954	3	-37.3088	2.16832	2
Zhanjiang	summer	ZJ5	2022-08-24	15:46:00	432.414	0.181104	2	-8.94713	0.0598742	2	-32.6875	1.90552	2		Zhanjiang	winter	ZJ5	2022-12-28	13:58:00	445.641	0.285193	2	-9.83744	0.0355466	2	-43.9562	2.4759	2
Zhanjiang	summer	ZJ5	2022-08-30	15:54:00	457.212	0.267768	2	-9.63292	0.0310985	2	-82.3603	1.80517	3		Zhanjiang	winter	ZJ5	2023-01-04	13:59:00	453.702	0.144906	6	-9.39325	0.0398732	6	-53.832	1.44725	6

## Sheet: Shaoguan
city	season	station	sampling date	start time	CO2 (ppm)	CO2_sd (ppm)	CO2_qc	δ13C (‰)	δ13C_sd (‰)	δ13C_qc	Δ14C (‰)	Δ14C_sd (‰)	Δ14C_qc		city	season	station	sampling date	start time	CO2 (ppm)	CO2_sd (ppm)	CO2_qc	δ13C (‰)	δ13C_sd (‰)	δ13C_qc	Δ14C (‰)	Δ14C_sd (‰)	Δ14C_qc
Shaoguan	summer	SG1	2022-07-27	13:12:00	NaN	NaN	9	NaN	NaN	9	-39.6714	1.97845	2		Shaoguan	winter	SG1	2022-12-13	15:02:00	426.948	0.179072	2	-9.07276	0.0661566	2	-13.1942	1.9837	2
Shaoguan	summer	SG1	2022-08-01	16:35:00	437.15	0.155551	2	-9.24703	0.0194235	2	-25.9877	2.21322	2		Shaoguan	winter	SG1	2022-12-20	13:32:00	428.317	0.159944	2	-9.00761	0.0264868	2	-19.8583	1.97706	2
Shaoguan	summer	SG1	2022-08-09	15:42:00	419.46	0.150961	2	-8.61319	0.0172743	2	-7.81438	1.81519	2		Shaoguan	winter	SG1	2022-12-27	13:50:00	429.515	0.188427	2	-8.83805	0.0458836	2	-24.2925	1.98833	2
Shaoguan	summer	SG1	2022-08-15	15:32:00	429.855	0.158644	2	-8.86433	0.0331709	2	-39.5983	2.11093	2		Shaoguan	winter	SG1	2023-01-03	13:17:00	433.075	0.129291	6	-8.94034	0.0240238	6	-23.8805	1.71536	6
Shaoguan	summer	SG2	2022-07-27	16:56:00	432.418	0.163682	2	-9.42772	0.0831103	2	-41.2444	1.81464	2		Shaoguan	winter	SG2	2022-12-13	15:29:00	429.803	0.149334	2	-8.68261	0.0239582	2	-25.2368	2.04929	2
Shaoguan	summer	SG2	2022-08-01	16:45:00	457.115	0.272378	2	-9.90121	0.0245887	2	-31.8076	1.85194	2		Shaoguan	winter	SG2	2022-12-20	15:24:00	435.729	0.175341	2	-9.12237	0.0714676	2	-29.6008	1.89381	2
Shaoguan	summer	SG2	2022-08-09	16:10:00	446.888	0.179692	2	-9.57378	0.0384992	2	-7.45055	2.13184	2		Shaoguan	winter	SG2	2022-12-27	13:55:00	429.67	0.152668	2	-8.73859	0.0856114	2	-25.0825	1.89474	2
Shaoguan	summer	SG2	2022-08-15	16:12:00	440.143	0.165309	2	-9.20638	0.0182749	2	-36.3643	2.12577	2		Shaoguan	winter	SG2	2023-01-03	13:28:00	436.068	0.131502	6	-9.12353	0.0345206	6	-33.0057	1.4877	6
Shaoguan	summer	SG3	2022-07-27	15:40:00	425.843	0.179368	2	-8.7261	0.0429187	2	-29.3018	1.87281	2		Shaoguan	winter	SG3	2022-12-13	16:27:00	437.903	0.223042	2	-9.08477	0.0595109	2	-42.3522	1.95456	2
Shaoguan	summer	SG3	2022-08-01	15:45:00	438.15	0.18791	2	-8.88493	0.0401913	2	-46.8323	1.8198	2		Shaoguan	winter	SG3	2022-12-20	14:33:00	427.338	0.168566	2	-8.83229	0.0243059	2	-20.8027	1.96997	2
Shaoguan	summer	SG3	2022-08-09	15:14:00	441.438	0.17893	2	-9.35888	0.02718	2	-4.68708	2.10891	2		Shaoguan	winter	SG3	2022-12-27	13:08:00	435.107	0.159034	2	-9.2332	0.0419207	2	-42.9501	1.92276	2
Shaoguan	summer	SG3	2022-08-15	15:16:00	458.542	0.184924	2	-9.84121	0.015642	2	-25.3759	1.88239	2		Shaoguan	winter	SG3	2023-01-03	13:39:00	435.844	0.115416	6	-8.88288	0.0539478	6	-34.0195	1.37681	6
Shaoguan	summer	SG4	2022-07-27	16:11:00	444.406	0.193251	2	-9.21055	0.0168495	2	-42.7244	2.68045	2		Shaoguan	winter	SG4	2022-12-13	16:54:00	424.816	0.162611	2	-8.48622	0.0862702	2	-15.09	1.99183	2
Shaoguan	summer	SG4	2022-08-01	13:22:00	434.331	0.193382	2	-9.02812	0.0586517	2	-47.9907	1.9781	2		Shaoguan	winter	SG4	2022-12-20	15:26:00	425.382	0.160862	2	-8.95307	0.0319006	2	-28.8999	2.03271	2
Shaoguan	summer	SG4	2022-08-09	13:12:00	434.345	0.22677	2	-8.98988	0.102191	2	-16.4928	1.95782	2		Shaoguan	winter	SG4	2022-12-27	15:39:00	423.199	0.164097	2	-8.94838	0.0779971	2	-17.9978	2.03688	2
Shaoguan	summer	SG4	2022-08-15	13:11:00	436.814	0.180966	2	-8.77292	0.0317175	2	-67.0106	2.00839	2		Shaoguan	winter	SG4	2023-01-03	16:12:00	422.839	0.112201	6	-8.62501	0.037576	6	-16.8213	1.47239	6
Shaoguan	summer	SG5	2022-07-27	13:00:00	470.706	0.238815	3	-10.3924	0.0269806	3	-22.0933	2.23087	3		Shaoguan	winter	SG5	2022-12-13	14:00:00	417.47	0.158205	2	-9.14187	0.0473847	3	-9.93915	2.06206	2
Shaoguan	summer	SG5	2022-08-01	13:05:00	416.625	0.167621	2	-9.03156	0.0197831	2	-3.71152	2.9128	2		Shaoguan	winter	SG5	2022-12-20	14:03:00	440.771	0.175756	3	-9.36734	0.0322332	3	-11.6048	2.11515	2
Shaoguan	summer	SG5	2022-08-09	13:55:00	432.128	0.154409	2	-9.41734	0.0459552	2	-4.95592	2.12112	2		Shaoguan	winter	SG5	2022-12-27	14:00:00	414.347	0.164821	2	-9.62806	0.0473754	3	-11.4984	2.15614	2
Shaoguan	summer	SG5	2022-08-15	13:40:00	410.869	0.189186	2	-9.05731	0.0241068	2	-2.31754	2.97729	2		Shaoguan	winter	SG5	2023-01-03	14:30:00	419.608	0.181506	2	-9.14605	0.030429	3	-10.4197	2.01167	2

## Sheet: qc
quality_flag
2-normal data
3-questionable data
4-problem data definitely
6-mean of two measurements
9-missing (null) data
